# Supplementary material for: Neutral and cationic yttrium alkyl complexes with linked 1,4,7-triazacyclononane-amide monoanionic ancillary ligands: synthesis and catalytic ethene polymerisation
Source: Royal Society of Chemistry journal article supplement (doi:10.1039/b101012n), 2001-01-01
Supplement: b101012n.doc [file b101012n.doc]

# Supporting material

to: “Neutral and cationic yttrium alkyl complexes with linked 1,4,7-triazacyclononane-amide monoanionic ancillary ligands: synthesis and catalytic ethene polymerisation”

by Bambirra, Van Leusen, Meetsma, Hessen and Teuben

# Experimental section

**General**. All experiments were carried out under an inert atmosphere of purified dinitrogen using standard Schlenk and glove-box techniques, unless mentioned otherwise. Toluene, pentane, diethyl ether and THF were distilled from Na or Na/K alloy before use. Benzene-*d*6 and THF-*d*8 were dried over Na/K alloy and vacuum transferred before use. Bromobenzene-*d*5 was degassed and dried over 4Å molecular sieves. *N*,*N*’-R2-1,4,7-triazacyclonoane (R = *i*-Pr, Me)5 and *N*-*tert*-butylchloroacetamide (A. J. Speziale, P. C. Hamm, *J. Am. Chem. Soc.* **1956**, *78*, 2556) were prepared according to literature procedures. [PhNMe2H][B(C6F5)4] (Asahi Glass Co.) was used as purchased. NMR spectra were recorded on Varian Unity 500, VXR 300 and Gemini 200 spectrometers. Polymer molecular weights were measured by Gel Permeation Chromatography, using a Waters 150 Gel Permeation Chromatograph equipped with a differential refractive index detector and calibrated using polystyrene standards. Samples were run in 1,2,4-trichlorobenzene (145ºC), using three Shodex GPC AT-80 M/S columns in series. Numerical analyses were performed using Expert Ease® software available from Waters Corporation. Elemental anayses were performed at the Microanalytical Department of the University of Groningen. All reported values are the average of at least two independent determinations.

***Synthesis of Y(CH2SiMe3)3(THF)2***

The preparation follows the route from reference 6 quoted in the paper.

LiCH2SiMe3 (1.57 g, 17.21 mmol) was added to a suspension of YCl3·THF3.5 (2.56 g, 5.70 mmol) in THF (20 ml) at 0 C. The reaction mixture was allowed to warm to room temperature and was then stirred for 14 hours. The solvent was subsequently removed under reduced pressure to leave a white residue. Extraction with pentane and subsequent evaporation of the solvent yielded 1.85 g of the title compound (3.80 mmol, 66 %) as white crystalline material. The product was pure by NMR spectroscopy.

1H NMR (300 MHz, C6D6, ): 3.83 (m, 8H, -THF), 1.32 (m, 8H, -THF), 0.29 (s, 12H, CH2Si*Me*3), -0.69 (d, 2*J*YH = 2.4 Hz, 6H, C*H*2SiMe3). 13C NMR (75.4 MHz, C6D6, ): 69.8 (t, 1*J*CH = 150.1 Hz, -THF), 33.8 (d, 1*J*YC = 34.18 Hz; t, 1*J*CH = 100.0 Hz, *C*H2SiMe3), 25.2 (t, 1*J*CH = 134.2 Hz, -THF), 4.5 (q, 1*J*CH = 117.0 Hz, CH2Si*Me*3).

***Synthesis of Me2-TACN-(CH2)2NHBut (2).***

**a) *N-tert-*Butylchloroacetamide.** This reaction was performed under aerobic conditions. To a cold solution of triethylamine (2 ml) in 50 ml of CH2Cl2, placed in an ice-bath, chloroacetyl chloride (1.5 ml, 20 mmol) was added carefully. At 0 oC, *tert*-butylamine (2.1 ml, 20 mmol) was added and the mixture was stirred for 1 hour. The mixture was washed with dilute aqueous NaHCO3, with water and once with brine, then dried (Na2SO4). After removal of the solvent, the residue was crystallized from petroleum ether (bp-40-60 oC) to give 1 g (33%) of product, mp 85 oC (reported mp 84 oC).[[1]](#endnote-2) 1H NMR (300 MHz, 25oC, CDCl3):  1.39 (s, 9H, But), 3.94 (s, 2H, CH2), 6.37 (br, N*H*).

**b) *N*-*tert*-Butyl-(4,7-dimethyl-[1,4,7]triazanon-1-yl)acetamide.** This reaction was performed under aerobic conditions. To a solution of crude 4,7-dimethyl-1,4,7-triazacyclononane (1.54 g, 9.8 mmol) in acetonitrile (10 mL) was added *N*-*tert*-butylchloroacetamide (1.49 g, 10 mmol) and 10 mg of sodium iodide. The mixture was refluxed for 1 hour, then poured into a mixture of water (100 ml) and 1 ml of concentrated hydrochloric acid. This was washed trice with ether. To the aqueous layer was added an aqueous solution of potassium hydroxide (2 g) and this was extracted with dichloromethane. After drying (Na2SO4) and removal of the solvent 1.72 g (6.7 mmol, 67%) of the crude product was obtained. 1H NMR (300 MHz, 25oC, CDCl3):  1.35 (s, 9H, But ), 2.36 (s, 6H, NMe), 2.6 (br m, 12H, NCH2), 3.11 (s, 2H, NCH2CO), 8.3 (br, N*H*).

**c) *N-tert*-Butyl-2-(4,7-dimethyl-[1,4,7]triazanon-1-yl)ethylamine (2).** To a solution of *N*-*tert*-butyl-(4,7-dimethyl-[1,4,7]triazanon-1-yl)acetamide (0.185 g, 0.7 mmol) in 7.5 ml of diglyme was added lithium aluminium hydride (0.30 g, 8 mmol). The mixture was refluxed for 3 hours, then cooled. Water (1.2 ml) was slowly added with cooling (internal temperature kept around 20 oC). The mixture was stirred until its color was white. After this point the work-up was continued under areobic conditions. Na2SO4 (10 g) was added and after 15 minutes the solids were removed and washed with ether. The combined filtrates were concentrated, first using a rotary evaporator, and then a Kugelrohr (0.2 mmHg, 70 oC). The remainder was further purified by acid-base extraction to give 0.11 g (50%) of **2** as an oil. The same reaction was also carried out on a 5 mmol scale, in which case the isolated yield of the amine was 45%.

1H NMR (300 MHz, CDCl3, 20 C, ): 2.66 (m, 4 H, NCH2), 2.62 (br, 8 H, NCH2), 2.58-2.53 (m, 4H, NCH2), 2.29 (s, 6 H, NMe), 1.04 (s, 9 H, But), NH not observed. 13C NMR (75.4 MHz, CDCl3, 20 C, ): 59.5 (t, *J*CH = 134.2 Hz, NCH2), 57.4 (t, *J*CH = 131.7 Hz, NCH2), 57.3 (t, *J*CH = 131.7 Hz, NCH2), 56.5 (t, *J*CH = 124.2 Hz, NCH2), 49.9 (d, *J*CH = 135.4 Hz, Pri CH), 46.9 (q, *J*CH = 131.7 Hz, N*Me*2), 40.4 (t, *J*CH = 133.4 Hz, NCH2), 30.8 (q, *J*CH = 123.3, Pri Me).

***Synthesis of [Me2-TACN-(CH2)2NBut]Y(CH2SiMe3)2 (4).***

*a) NMR-tube scale.* (Me3SiCH2)3Y(THF)2 (15 mg, 30.4 µmol) was dissolved in C6D6 (0.6 ml) and added to Me2-TACN-(CH2)2NHBut (**2**; 7 mg, 30.4 µmol). The solution was transferred to an NMR tube and analysed with 1H NMR spectroscopy, showing clean conversion to **4**, SiMe4 and free THF.

*b) Preparative scale.* A solution of Me2-TACN-(CH2)2SiMe2NHBut (**2**; 0.83 g, 3.25mmol) in pentane (10 ml) was added dropwise to a solution of (Me3SiCH2)3Y(THF)2 (1.61 g, 3.25 mmol) in pentane (30 ml) at ambient temperature. The reaction mixture was stirred overnight, after which the volatiles were removed *in vacuo*. The residue was stripped of residual THF by stirring with pentane (5 ml) which was subsequently removed *in vacuo*. The resulting sticky solid was extracted with pentane (3  20 ml). Concentrating and cooling the extract to – 30 ºC gives **4** as a crystalline solid (1.50 g, 2.80 mmol, 86 %).

1H NMR (500 MHz, - 60 C, C7D8) : 3.32 (m, 1 H, NCH2), 3.12-3.00 (m, 2 H, NCH2), 2.87-2.69 (m, 3H, NCH2), 2.33 (m, 1 H, NCH2), 2.33 (s, 3 H, NMe2), 2.22 (m, 1 H, NCH2), 2.16 (s, 3 H, Me2), 1.76-1.56 (m, 4H, NCH2), 1.52 (s, 9 H, But), 1.39 (m, 4 H, NCH2), 0.64 (s, 9 H, *Me*3SiCH2), 0.57 (s, 9 H, *Me*3SiCH2), -0.62 (d, *J*HH = 11.0 Hz, 1 H, Me3SiC*H*2), -0.86 (d, *J*HH = 11.0 Hz, 1 H, Me3SiC*H*2), -0.94 (d, *J*HH = 11.0 Hz, 1 H, Me3SiC*H*2), -1.06 (d, *J*HH = 10.5 Hz, 1 H, Me3SiC*H*2). The *J*YH coupling on the YCH2 protons is unresolved. 13C NMR (125.7 MHz, - 60 C, C7D8) : 59.8 (t, *J*CH = 138.9 Hz, NCH2), 58.9 (t, *J*CH = 135.2 Hz, NCH2), 57.5 (t, *J*CH = 135.4 Hz, NCH2), 54.8 (t, *J*CH = 135.3 Hz, NCH2), 53.9 (s, But C), 53.1 (t, *J*CH = 129.6 Hz, NCH2), 51.4 (t, *J*CH = 138.6 Hz, NCH2), 49.3 (q, part. overlap, NMe), 48.9 (q, part. overlap, NMe), 48.4 (t, *J*CH = 140.4 Hz, NCH2), 47.0 (t, *J*CH = 123.7 Hz, NCH2), 30.8 (q, *J*CH = 123.3, But Me), 29.8 (dt, *J*YC = 35.4 Hz, *J*CH = 93.3 Hz, YCH2), 28.5 (dt, *J*YC = 38.9 Hz, *J*CH = 97.3 Hz. YCH2), 5.2 (q, *J*CH = 116.9 Hz, *Me*3SiCH2Y), 5.1 (q, *J*CH = 116.5 Hz, *Me*3SiCH2Y). Anal. Calcd for C22H53N4Si2Y: C, 50.94; H, 10.30; N, 10.80. Found: C, 50.86; H, 10.24; N, 10.77.

***Reaction of [Me2-TACN-(CH2)2NBut]Y(CH2SiMe3)2 (4) with [HNMe2Ph][B(C6F5)4]***

A solution of [Me2-TACN-(CH2)2NBut]Y(CH2SiMe3)2 (**4**; 20 mg, 38.5 µmol) in C6D5Br (0.6 ml) was added to [HNMe2Ph][B(C6F5)4] (30 mg, 38.5 µmol). The obtained solution was transferred to a NMR tube and analysed by NMR spectroscopy, which showed full conversion to the cationic species {[Me2-TACN-(CH2)2NBut]Y(CH2SiMe3)}[B(C6F5)4] (**6**), SiMe4 and free PhNMe2.

1H NMR (500 MHz, - 30 C, C6D5Br) : 7.23 (t, 3*J*HH = 8.0 Hz, 2 H, m-H *Ph*NMe2), 6.78 (t, 3*J*HH = 7.0 Hz, 1 H, p-H *Ph*NMe2), 6.60 (d, 3*J*HH = 8.0 Hz, 2 H, o-H *Ph*NMe2), 2.64 (s, 6 H, PhN*Me*2), 2.58-2.22 (m, 16 H, NCH2), 2.18 (s, 6 H, TACN N*Me*), 1.09 (s, 9 H, But), 0.11 (s, 9 H, CH2Si*Me*3), 0.01 (s, 12 H, Si*Me*4), ‑1.06 (br, 2 H, YCH2). 13C{1H} NMR (125.7 MHz, C6D5Br, - 30 C ): 150.14 (ipso-C, *Ph*NMe2), 148.40 (d, 1*J*CF = 243.4 Hz, o-CF, B(C6F5)4), 138.33 (d, 1*J*CF = 233.7 Hz, p-CF, B(C6F5)4), 136.42 (d, 1*J*CF = 248.2 Hz, m-CF, B(C6F5)4), 129.17 (o-CH, *Ph*NMe2), 124.27 (br, ipso-C, B(C6F5)4), 116.84 (p-CH, *Ph*NMe2), 112.68 (m-CH, *Ph*NMe2), 60.09 (NCH2), 56.05 (NCH2), 53.33 (But C), 53.75 (NCH2), 51.78 (NCH2), 46.51 (TACN N*Me*), 46.16 (NCH2), 40.50 (PhN*Me*2), 37.02 (d, 1*J*YC = 40.7 Hz, Y*C*H2), 30.17 (But Me), 4.31 (YCH2Si*Me*3), 0.05 (Si*Me*4). 19F NMR (470 MHz, 20 C, C6D5Br) : -137.17 (d, 3*J*FF = 10.3 Hz, o-CF), -167.23 (d, 3*J*FF = 20.7 Hz, p-CF), -171.22 (d, 3*J*FF = 16.9 Hz, m-CF).

***Synthesis of (i-Pr)2-TACN-(CH2)2NHBut******(1).***

**a)*****N*-*tert*-Butyl-(4,7-diisopropyl-[1,4,7]triazanon-1-yl)acetamide.** To a solution of crude 4,7-diisopropyl-1,4,7-triazacyclononane (0.49g, 2.25 mmol) in dimethylformamide (1 mL) was added *N*-*tert*-butylchloroacetamide (0.335 g, 2.25 mmol). After 2 hours of reflux and workup by using acid-base extraction, a semi-solid material was obtained. By column chromatography (alumina activity II-III, eluens ether), 0.19 g (27%) of product was obtained. 1H NMR (CDCl3)  0.91 (d, 12H), 1.30 (s, 9H), 2.5-2.7 (m, 12H), 2.83 (m, 2H), 3.04 (s, 2H), 7.9 (br, N*H*).

**b) *N-tert*-Butyl-2-(4,7-diisopropyl-[1,4,7]triazanon-1-yl)ethylamine.** To a solution of *N*-*tert*-butyl-(4,7-diisopropyl-[1,4,7]triazanon-1-yl)acetamide (0.19 g, 0.6 mmol) in 10 mL of dimethoxyethane (DME) was added lithium aluminium hydride (0.5 g, 12.5 mmol). After reflux for 100 hours and workup (see above) 0.17 g (0.54 mmol, 90 %) of crude **1** was obtained (containing 10% of the acetamide starting material). 1H NMR (300 MHz, 25oC, C6D6) : 2.82 (sept, 3*J*HH = 6.6 Hz, 2H, Pri CH), 2.76-2.73 (m, 4 H, NCH2), 2.62-2.54 (m, 8 H, NCH2), 2.51(s, 4H, NCH2), 1.06 (s, 9 H, But), 0.91 (d, 3*J*HH = 6.6 Hz, 12H, Pri Me), NH not observed. 13C NMR (75.4 MHz, 25oC, C6D6) : 58.7 (d, *J*CH = 134 Hz, Pri CH), 56.1 (t, *J*CH = 131.7, NCH2), 54.6 (t, *J*CH = 132 Hz, NCH2), 52.8 (t, 1*J*CH = 128.1 Hz, NCH2), 52.6 (t, 1*J*CH = 128.1 Hz, NCH2), 49.9 (But C), 40.3 (t, 1*J*CH = 133.0 Hz, NCH2), 29.0 (q, *J*CH = 124.4 Hz, But Me), 18.3 (q, *J*CH = 124.4 Hz, Pri Me).

***Synthesis of [(Pri)2-TACN-(CH2)2NBut]Y(CH2SiMe3)2 (3).***

*a) NMR-tube scale.* (Me3SiCH2)3Y(THF)2 (20 mg, 40.4 µmol) was dissolved in C6D6 (0.6 ml) and added to (Pri)2-TACN-(CH2)2NHBut (**1**; 12 mg, 40.4 µmol). The solution was transferred to an NMR tube and analyzed with 1H NMR spectroscopy, showing conversion to **3**, SiMe4 and free THF.

*b) Preparative scale.* At ambient temperature, a solution of (Pri)2-TACN-(CH2)2NHBut (**1**; 0.16 g, 0.50 mmol) in pentane (10 ml) was added dropwise to a solution of (Me3SiCH2)3Y(THF)2 (0.25 g, 0.52 mmol) in pentane (30 ml). The reaction mixture was stirred overnight, after which the volatiles were removed *in vacuo*. The residue was stripped of residual THF by stirring with pentane (5 ml) which was subsequently removed *in vacuo*. The resulting sticky solid was extracted with pentane (20 ml). Cooling to – 30 ºC gives the crystalline title compound (0.080 g, 0.14 mmol, 28 %).

1H NMR (300 MHz, 25oC, C6D6) : 3.77 (sept, *J*HH = 6.6 Hz, 1H, Pri CH), 3.42 (partially overlapped, Pri CH), 3.40 (m, 1 H, NCH2), 3.23 (dt, *J*HH = 12.0, 3.9 Hz, 1 H, NCH2), 3.19-3.09 (m, 2H, NCH2), 2.81 (dt, *J*HH = 12.9, 5.1 Hz, 1 H, NCH2), 2.50 (dt, *J*HH = 12.9, 4.8 Hz, 1 H, NCH2), 2.20 (dd, *J*HH = 10.8, 3.3 Hz, 1 H, NCH2), 2.06-1.97 (m, 3H, NCH2), 1.77 (dd, *J*HH = 12.9, 3.9 Hz, 2 H, NCH2), 1.71 (m, 1H, NCH2), 1.55 (s, 9 H, But), 1.48 (m, 1H, NCH2), 1.31 (d, *J*HH = 6.6 Hz, 3 H, Pri Me), 1.14 (d, *J*HH = 6.6 Hz, 3 H, Pri Me), 0.58 (d, *J*HH = 6.6 Hz, 3 H, Pri Me), 0.48 (s, 9 H, *Me*3SiCH2), 0.47 (d, *J*HH = 6.6 Hz, 3 H, Pri Me), 0.41 (s, 9 H, *Me*3SiCH2), -0.26 (dd, *J*HH = 10.5 Hz, *J*YH = 3.3 Hz, 1 H, YC*H*H), -0.53 (dd, *J*HH = 10.8 Hz, *J*YH = 2.1 Hz, 1 H, YC*H*H), -0.83 (dd, *J*HH = 10.8 Hz, *J*YH = 3.0 Hz, 1 H, YCH*H*), -1.00 (dd, *J*HH = 10.8 Hz, *J*YH = 2.1 Hz, 1 H, YCH*H*). 13C NMR (125.7 MHz, C6D6, ): 57.7 (t, *J*CH = 128.9 Hz, NCH2), 56.0 (t, *J*CH = 132.2 Hz, NCH2), 54.9 (d, *J*CH = 138.6 Hz, Pri CH), 54.5 (d, *J*CH = 143.4 Hz, Pri CH), 53.8 (s, But C), 52.2 (t, *J*CH = 138.6 Hz, NCH2), 51.5 (t, *J*CH = 137.0 Hz, NCH2), 51.1 (t, *J*CH = 135.7 Hz, NCH2), 44.8 (t, *J*CH = 128.8 Hz, NCH2), 41.6 (t, *J*CH = 130.4 Hz, NCH2), 41.5 (t, *J*CH = 127.3 Hz, NCH2), 33.7 (dt, *J*YC = 36.9 Hz, *J*CH = 95.1 Hz, YCH2), 31.2 (q, *J*CH = 122.4, But Me), 31.0 (t, *J*YC = 38.7 Hz, *J*CH = 95.0 Hz, YCH2), 23.5 (q, *J*CH =127.3 Hz, Pri Me), 23.0 (q, *J*CH =125.7 Hz, Pri Me), 13.1 (q, *J*CH =125.7 Hz, Pri Me), 12.7 (q, *J*CH =125.7 Hz, Pri Me), 5.4 (q, *J*CH = 117.6 Hz, *Me*3SiCH2Y), 5.2 (q, *J*CH = 116.0 Hz, *Me*3SiCH2Y). Anal. Calcd for C26H61N4Si2Y: C, 54.32; H, 10.70; N, 9.75; Y, 15.47. Found: C, 53.75; H, 10.27; N, 9.70; Y, 15.24.

***Reaction of*** ***[(Pri)2-TACN-(CH2)2NBut]Y(CH2SiMe3)2 (3) with [HNMe2Ph][B(C6F5)4].***

*a) In the absence of THF.* A solution of [(Pri)2-TACN-(CH2)2NBut]Y(CH2SiMe3)2 (**3**; 12 mg, 20.8 µmol) in C6D5Br (0.6 ml) was added to [HNMe2Ph][B(C6F5)4] (17 mg, 20.8 µmol). The obtained solution was transferred to a NMR tube and and analyzed by NMR spectroscopy, which showed evolution of two equivalents of SiMe4 and one equivalent of propene, and the formation of an ill-defined yttrium species.

*b) In the presence of THF.* A solution of [(Pri)2-TACN(CH2)2NBut]Y(CH2SiMe3)2 (**3**; 24 mg, 41.6 µmol) in C6D5Br (0.6 ml) with three drops of additional THF-*d*8 was added to [HNMe2Ph][B(C6F5)4] (34 mg, 41.6 µmol). The obtained solution was transferred into a NMR tube and analyzed by NMR spectroscopy, which showed full conversion to the cationic species {[(Pri)2-TACN-(CH2)2NBut]Y(CH2SiMe3)(THF-*d*8)}[B(C6F5)4] (**5**.THF-*d*8), SiMe4 and free PhNMe2.

1H NMR (500 MHz, - 30 ºC, C6D5Br) : 7.23 (t, 3*J* = 7.5 Hz, 2 H, m-H *Ph*NMe2), 6.77 (t, 3*J* = 7.5 Hz, 1 H, p-H *Ph*NMe2), 6.58 (d, 3*J* = 7.5 Hz, 2 H, o-H *Ph*NMe2), 3.48 (sept, *J*HH = 6.0 Hz, 1H, Pri CH), 3.40 (t, *J*HH = 13.0 Hz, 1 H, NCH2), 2.79-2.75 (m, 2 H, NCH2), 2.72 (s, 6 H, PhN*Me*2), 2.68-2.59 (m, 3H, NCH2), 2.55-2.48 (m, 2 H, NCH2), 2.42-2.29 (m, 3 H, NCH2), 2.25-2.17 (m, 3 H, NCH2), 1.27 (br, 1H, Pri CH), 1.18 (d, *J*HH = 6.0 Hz, 6 H, Pri Me), 1.15 (s, 9 H, But), 0.84 (d, *J*HH = 5.5 Hz, 3 H, Pri Me), 0.80 (d, *J*HH = 5.5 Hz, 3 H, Pri Me), 0.09 (s, 9 H, *Me*3SiCH2), 0.07 (s, 12 H, *Me*4Si), -1.29 (dd, *J*HH = 11.0 Hz, *J*YH = 3.0 Hz, 1 H, YC*H*H), -1.35 (dd, *J*HH = 11.0 Hz, *J*YH = 3.0 Hz, 1 H, YCH*H*).

# *General Procedure for the Catalytic Ethene Polymerisation Experiments*

The polymerisation experiments were performed in a stirred stainless steel 0.5L autoclave, fully temperature (electrical heating, water cooling) and pressure controlled, and equipped with an inert atmosphere solvent supply line and a pneumatically operated injector for the (co)catalyst solutions. Toluene (Aldrich anhydrous, 99.5%) was passed over columns of alumina, oxygen scavenger (BASF R3-11) and molecular sieves (4Å) before being passed to the reactor. Ethene (AGA, polymer grade) was passed over columns of oxygen scavenger (BASF R3-11) and molecular sieves (4Å) before being passed to the reactor.

In a typical experiment, solutions were made in a dry-box of the dialkyl complex (**3** or **4**; 10 mol) and of [HNMe2Ph][B(C6F5)4](10 mol), each in 5 ml of toluene in separate vials sealed with a serum cap. The autoclave was charged with 150 ml of toluene, equilibrated at the desired reaction temperature, and pressurized with ethene (5 bar). The solution of [HNMe2Ph][B(C6F5)4]was injected first into the reactor and the reaction was started by subsequently injecting the solution of the appropriate dialkyl complex. The ethylene pressure was kept constant (within 0.1 bar) during the reaction by replenishing flow. The polymer obtained was rinsed with methanol and dried in a vacuum oven (70oC).

1. [↑](#endnote-ref-2)
